# Supplementary material
Source: PubMed Central journal article supplement (PMC4178645)
Supplement: AEM.01666-14_zam999105733so1.pdf [file AEM.01666-14_zam999105733so1.pdf]

Table S1. A nucleotide sequence alignment of each forward and reverse hgcA-targeted PCR primers to select genomic sequences. Mismatched base pairs are indicated in red.

| Strain                                                | Taxonomic position |                     | hgcA_F forward primer |                                  | hgcB_R reverse primer |                     |
|-------------------------------------------------------|--------------------|---------------------|-----------------------|----------------------------------|-----------------------|---------------------|
|                                                       | Phylum             | Class               | Gene Locus            | GCNRTYAAVRTNIGGTGGCG             | Gene Locus            | CAGGCCCGCAATCCATGCA |
| <i>Geobacter metallireducens</i> RCH3                 | Proteobacteria     | Deltaproteobacteria | GeomsDRAFT_0749       | GGATCAATGCTGGTGGCG               | GeomsDRAFT_0748       | CAGGCCCGCAATCCATGCA |
| <i>Geobacter metallireducens</i> GS-15                | Proteobacteria     | Deltaproteobacteria | Gmet_1240             | GGATCAATGCTGGTGGCG               | Gmet_1241             | CAGGCCCGCAATCCATGCA |
| <i>Geobacter sulfurreducens</i> PCA                   | Proteobacteria     | Deltaproteobacteria | GSU1440               | GGATTAATGCTGGTGGCG               | GSU1441               | CAGGCCCGCAATCCATGCA |
| <i>Geobacter sulfurreducens</i> KM400                 | Proteobacteria     | Deltaproteobacteria | KM400_1466            | GGATTAATGCTGGTGGCG               | KM400_1468            | CAGGCCCGCAATCCATGCA |
| <i>Geobacter</i> sp. FRC-32                           | Proteobacteria     | Deltaproteobacteria | Geob_2483             | GGATCAATGCTGGTGGCG               | Geob_2482             | CAGGCCCGCAATCCATGCA |
| <i>Geobacter uranireducens</i> Rf4                    | Proteobacteria     | Deltaproteobacteria | Gura_0480             | GGATTAACGCTGGTGGCG               | Gura_0481             | CAGGCCCGCAATCCATGCA |
| <i>Geobacter bemidjensis</i> Bem                      | Proteobacteria     | Deltaproteobacteria | Gbem_1163             | GGATCAACGCTGGTGGCG               | Gbem_1164             | CAGGCCCGCAATCCATGCA |
| <i>Geobacter</i> sp. M18                              | Proteobacteria     | Deltaproteobacteria | GM18_1031             | GGATCAACGCTGGTGGCG               | GM18_1032             | CAGGCCCGCAATCCATGCA |
| <i>Geobacter</i> sp. M21                              | Proteobacteria     | Deltaproteobacteria | GM21_3091             | GGATCAACGCTGGTGGCG               | GM21_3090             | CAGGCCCGCAATCCATGCA |
| <i>Desulfovibrio desulfuricans</i> ND132              | Proteobacteria     | Deltaproteobacteria | Dnd132_1056           | GGATCAACGCTGGTGGCG               | Dnd132_1057           | CAGGCCCGCAATCCATGCA |
| <i>Desulfovibrio aespeensis</i> Aspo-2                | Proteobacteria     | Deltaproteobacteria | Daes_2682             | GGATCAACGCTGGTGGCG               | Daes_2683             | CAGGCCCGCAATCCATGCA |
| <i>Desulfovibrio africanus</i> Welis Bay              | Proteobacteria     | Deltaproteobacteria | Desaf_0117            | GGATCAACGCTGGTGGCG               | Desaf_0115            | CAGGCCCGCAATCCATGCA |
| <i>Desulfovibrio oxydinae</i> DSM 11498               | Proteobacteria     | Deltaproteobacteria | B149DRRAFT_02526      | GGATCAATGCTGGTGGCG               | B149DRRAFT_02527      | CAGGCCCGCAATCCATGCA |
| <i>Desulfobulbus propionicus</i> DSM 2032             | Proteobacteria     | Deltaproteobacteria | Despr_0439            | GGATCAATGCTGGTGGCG               | Despr_0438            | CAGGCCCGCAATCCATGCA |
| <i>Desulfomicrobium baculatum</i> DSM 4028            | Proteobacteria     | Deltaproteobacteria | Dbac_0376             | GGATCAACGCTGGTGGCG               | Dbac_0375             | CAGGCCCGCAATCCATGCA |
| <i>Desulfonatronospira thiodismutans</i> ASO3-1       | Proteobacteria     | Deltaproteobacteria | Dtho_PD1043           | GGAA <sup>T</sup> AAATGCTGGTGGCG | Dtho_PD1042           | CAGGCCCGCAATCCATGCA |
| Uncultured <i>Desulfobacterium</i> sp.                | Proteobacteria     | Deltaproteobacteria | NAT_A07900            | GGATCAATGCTGGTGGCG               | NAT_A07910            | CAGGCCCGCAATCCATGCA |
| <i>Desulfonatronum lacustris</i> Z-7951               | Proteobacteria     | Deltaproteobacteria | DeslaDRAFT_0127       | GGATCAATGCTGGTGGCG               | DeslaDRAFT_0126       | CAGGCCCGCAATCCATGCA |
| <i>Deferriusoma camini</i> S3R1                       | Proteobacteria     | Deltaproteobacteria | DefcaDRAFT_2106       | GGATCAACGCTGGTGGCG               | DefcaDRAFT_2107       | CAGGCCCGCAATCCATGCA |
| <i>Syntrophorhabdus aromalicovorans</i> UI            | Proteobacteria     | Deltaproteobacteria | SynarDRAFT_0655       | GGATTAACGCTGGTGGCG               | SynarDRAFT_0656       | CAGGCCCGCAATCCATGCA |
| <i>Desulfomonile bedjei</i> DCB-1                     | Proteobacteria     | Deltaproteobacteria | Desb_1022             | GGAA <sup>T</sup> AAATGCTGGTGGCG | Desb_1023             | CATGTCGGCAATCCATGCA |
| <i>Syntrophus aciditrophicus</i> SB                   | Proteobacteria     | Deltaproteobacteria | SYN_00351             | GGATCAATGCTGGTGGCG               | SYN_00352             | CAGGCCCGCAATCCATGCA |
| <i>Deitis proteobacterium</i> NaphS2                  | Proteobacteria     | Deltaproteobacteria | NPH_5533              | GGATCAACGCTGGTGGCG               | NPH_5534              | CAGGCCCGCAATCCATGCA |
| <i>Dehalococcoides mccartyi</i> DCMB5                 | Chloroflexi        | Dehalococcoidetes   | dcmB_330              | GGATCAATGCTGGTGGCG               | dcmB_329              | CAGGCCCGCAATCCATGCA |
| <i>Desulfosporosinus acidiphilus</i> S14              | Firmicutes         | Clostridia          | Desaa_1621            | GGAA <sup>T</sup> TAACGCTGGTGGCG | Desaa_1622            | CATGTCGGCAATCCATGCA |
| <i>Desulfobacterium dehalogenans</i> DSM9161          | Firmicutes         | Clostridia          | Desde_2772            | GGAA <sup>T</sup> AAATGCTGGTGGCG | Desde_2771            | CAGGCCCGCAATCCATGCA |
| <i>Dehalobacter</i> sp. CF                            | Firmicutes         | Clostridia          | DCF50_p1170           | GGATTAATGCTGGTGGCG               | DCF50_p1169           | CAGGCCCGCAATCCATGCA |
| <i>Dehalobacter</i> sp. 11DCA                         | Firmicutes         | Clostridia          | DHBDCA_p1092          | GGTATTAATGCTGGTGGCG              | DHBDCA_p1091          | CAGGCCCGCAATCCATGCA |
| <i>Desulfosporosinus orientis</i> DSM 765             | Firmicutes         | Clostridia          | Desor_2652            | GGATCAATGCTGGTGGCG               | Desor_2653            | CAGGCCCGCAATCCATGCA |
| <i>Desulfobacterium dichrocolimminans</i> LMG P-21439 | Firmicutes         | Clostridia          | Desd_0780             | GGATCAATGCTGGTGGCG               | Desd_0781             | CAGGCCCGCAATCCATGCA |
| <i>Desulfosporosinus</i> sp. OT                       | Firmicutes         | Clostridia          | DOT_5805              | GGATCAATGCTGGTGGCG               | DOT_5807              | CAGGCCCGCAATCCATGCA |
| <i>Desulfosporosinus youngiae</i> DSM 17734           | Firmicutes         | Clostridia          | DesyDRAFT_4238        | GGGTCAATGCTGGTGGCG               | DesyDRAFT_4237        | CAGGCCCGCAATCCATGCA |
| <i>Acetoneama longum</i> DSM 6540                     | Firmicutes         | Clostridia          | ALO_18015             | GGATCAACGCTGGTGGCG               | ALO_18015             | CAGGCCCGCAATCCATGCA |
| <i>Dehalobacter alkaliphilus</i> AHT 1                | Firmicutes         | Clostridia          | DealDRAFT_3158        | GGATTAATGCTGGTGGCG               | DealDRAFT_3157        | CAGGCCCGCAATCCATGCA |
| <i>Dehalobacter restrictus</i> DSM 9455               | Firmicutes         | Clostridia          | Dehre_1982            | GGATTAATGCTGGTGGCG               | Dehre_1981            | CAGGCCCGCAATCCATGCA |
| <i>Dehalobacter</i> sp. FTH1                          | Firmicutes         | Clostridia          | A37GDRAFT_03566       | GGTATTAATGCTGGTGGCG              | A37GDRAFT_03565       | CAGGCCCGCAATCCATGCA |
| <i>Desulfobacterium metallireducens</i> 853-15A       | Firmicutes         | Clostridia          | Desme_1742            | GGATCAATGCTGGTGGCG               | Desme_1741            | CATGTCGGCAATCCATGCA |
| <i>Desulfobacterium</i> sp. PCE1                      | Firmicutes         | Clostridia          | DesPCE1DRAFT_2748     | GGAA <sup>T</sup> AAATGCTGGTGGCG | DesPCE1DRAFT_2747     | CAGGCCCGCAATCCATGCA |
| <i>Ethanoligenens harbinensis</i> YJIAN-3             | Firmicutes         | Clostridia          | Ethna_0975            | GGTGTAAATGCTGGTGGCG              | Ethna_0976            | CAGGCCCGCAATCCATGCA |
| <i>Syntrophobactilus glycolicus</i> DSM 8271          | Firmicutes         | Clostridia          | Sgly_2362             | GGGTAAATGCTGGTGGCG               | Sgly_2361             | CAGGCCCGCAATCCATGCA |
| <i>Methanofollis limnatis</i> DSM 4140                | Euryarchaeota      | Methanomicrobia     | Meth_1685             | GGATCAATGCTGGTGGCG               | Meth_1684             | CAGGCCCGCAATCCATGCA |
| <i>Methanoregula boonei</i> 6A8                       | Euryarchaeota      | Methanomicrobia     | Mboo_0422             | GGGCTAAATGCTGGTGGCG              | Mboo_0421             | CATGTCGGCAATCCATGCA |
| <i>Methanoregula formica</i> SMSP                     | Euryarchaeota      | Methanomicrobia     | Mefor_0951            | GGATCAATGCTGGTGGCG               | Mefor_0952            | CAGGCCCGCAATCCATGCA |
| <i>Methanospirillum hungatei</i> E1-9c                | Euryarchaeota      | Methanomicrobia     | Mhu_1034              | GGATCAATGCTGGTGGCG               | Mhu_1035              | CAGGCCCGCAATCCATGCA |
| <i>Methanospirillum hungatei</i> F-1                  | Euryarchaeota      | Methanomicrobia     | Mhun_0876             | GGATTAATGCTGGTGGCG               | Mhun_0875             | CATGTCGGCAATCCATGCA |
| <i>Methanomethylovorus hollandicus</i> DSM 15978      | Euryarchaeota      | Methanomicrobia     | Metho_0631            | GGATTAATGCTGGTGGCG               | Metho_0630            | CATGTCGGCAATCCATGCA |
| <i>Methanobolbus psychrophilus</i> R15                | Euryarchaeota      | Methanomicrobia     | Mpsy_0587             | GGATTAATGCTGGTGGCG               | Mpsy_0586             | CATGTCGGCAATCCATGCA |
| <i>Methanocella arvoryzae</i> MRE50                   | Euryarchaeota      | Methanomicrobia     | RCIX2342              | GGATCAACGCTGGTGGCG               | RCIX2341              | CAGGCCCGCAATCCATGCA |
| <i>Methanocella paludicola</i> SA1AE                  | Euryarchaeota      | Methanomicrobia     | MCP_0718              | GGATCAACGCTGGTGGCG               | MCP_0717              | CAGGCCCGCAATCCATGCA |
| <i>Methanobolbus indarius</i> DSM 2278                | Euryarchaeota      | Methanomicrobia     | MethDRAFT_2866        | GGATTAACGCTGGTGGCG               | MethDRAFT_2865        | CATGTCGGCAATCCATGCA |

Mixed base definitions: R=A/G, Y=C/T, V=A/C/G, D=A/T/G, N=A/C/G/T

Bae et al. 2014

**Table S2.** Mean concentrations in the surface waters, porewaters, and soils for ortho-phosphate, total phosphorus, sulfate, methylmercury, dissolved iron, dissolved organic carbon, and dissolved oxygen at the study sites. The oxidation-reduction potential (SHE) of the soils are also provided.

| Geochemical factors                  |                      | Sample collection number | WCA-2A |       | WCA-3A |
|--------------------------------------|----------------------|--------------------------|--------|-------|--------|
|                                      |                      |                          | F1     | U3    | W3     |
| Ortho-Phosphate                      | Surface water (µg/L) | 7                        | 9      | 2     | 3      |
|                                      | Pore water (µg/L)    | 21                       | 640    | 3     | 2      |
| Total Phosphorus                     | Surface water (µg/L) | 7                        | 66     | 8     | 5      |
|                                      | Soil (mg/kg)         | 4                        | 842    | 311   | 448    |
| Sulfate                              | Surface (mg/L)       | 7                        | 19.2   | 16.9  | 0.4    |
|                                      | Pore water (mg/L)    | 21                       | 5.4    | 3.7   | 0.4    |
| Methylmercury                        | Surface water (ng/L) | 7                        | 0.088  | 0.438 | 0.083  |
|                                      | Pore water (ng/L)    | 21                       | 0.028  | 0.087 | 0.121  |
|                                      | Soil (ng/g)          | 4                        | 0.229  | 0.591 | 1.4    |
| Dissolved Iron                       | Surface water (µg/L) | 7                        | 48     | 49    | 108    |
|                                      | Pore water (µg/L)    | 21                       | 120    | 78    | 1556   |
|                                      | Soil (mg/kg)         | 4                        | 2115   | 2580  | 5275   |
| Dissolved Organic Carbon             | Surface water (µg/L) | 7                        | 40.6   | 34.6  | 17.4   |
|                                      | Pore water (µg/L)    | 21                       | 123.9  | 41.3  | 26.1   |
| Oxidation-Reduction Potential (SHE)* | Soil (mV)            | U3: 4<br>F1 and W3: 10   | -151   | -50   | 144    |
| Dissolved Oxygen                     | Surface water (mg/L) | 6                        | 2.8    | 2.8   | 2.7    |

Notes: The surface and pore waters (6-10 cm soil interval) were collected at study sites from August and September in 2010, October 2011, February, June and November in 2012, and March 2013, with the exception of dissolved oxygen which was measured on all dates except for March 2013.

The soils (0-10 cm interval) were collected on August 2010, February and June in 2012, and in March 2013. Methylmercury analyses were performed on unfiltered surface waters and on filtered pore water samples (except for Nov. 2012, when pore waters were unfiltered). All solids data reported on a dry wt. basis.

Source of data: South Florida Water Management District. SHE = Standard Hydrogen Electrode.

N= number of samples collected during the entire sampling period (single sample for surface waters and soils, and triplicate pore water samples per sampling date).

\*oxidation-reduction potential was measured at F1 on 12/13/06 at a soil depth of 6-10 cm, at U3 on 1/15/09 at a soil depth of 3-7 cm, and at W3 on 1/19/09 and 12/8/10 at a soil depth of 4-8 cm.

Table S3. Composition of hgcA and phylogenetic affiliation of OTUs with known sequences

Table with columns: Sequence no. included in OTUs (F1, U3, W3, Sum), Cluster I.D., Cluster, Subcluster, Reference strains included in clade (accession no.), Phylum, Class, Order, Family. Rows include various OTUs like OTU12, WCAB309, U3F08, etc., categorized by phylum such as Proteobacteria, Firmicutes, and Euryarchaeota.



**Bae et al. 2014**

**Table S5. Richness and diversity of *hgcA*- and *dsrB*-OTUs in the clone libraries.**

All parameters were estimated in Mothur (see Materials and Methods of text of manuscript)

| Gene        | Site | Clone no. screened | Cutoff | No. of OUT | Chao1 richness (CI) <sup>a</sup> | Shannon diversity (CI) | Coverage (%) |
|-------------|------|--------------------|--------|------------|----------------------------------|------------------------|--------------|
| <i>hgcA</i> | F1   | 66                 | 5%     | 51         | 125 (83, 225)                    | 3.9 (3.7, 4.0)         | 41           |
|             |      |                    | 10%    | 51         | 125 (82, 225)                    | 3.9 (3.7, 4.0)         | 41           |
|             |      |                    | 15%    | 50         | 110 (76, 193)                    | 3.8 (3.6, 4.0)         | 44           |
|             |      |                    | 20%    | 46         | 120 (75, 231)                    | 3.6 (3.4, 3.9)         | 47           |
|             | U3   | 76                 | 5%     | 57         | 139 (93, 242)                    | 3.9 (3.8, 4.1)         | 43           |
|             |      |                    | 10%    | 53         | 112 (78, 189)                    | 3.8 (3.7, 4.0)         | 50           |
|             |      |                    | 15%    | 49         | 87 (65, 141)                     | 3.7 (3.6, 3.9)         | 59           |
|             |      |                    | 20%    | 45         | 87 (62, 156)                     | 3.6 (3.5, 3.8)         | 63           |
|             | W3   | 64                 | 5%     | 64         | 250 (146, 483)                   | 4.1 (3.9, 4.2)         | 29           |
|             |      |                    | 13%    | 63         | 216 (132, 404)                   | 4.0 (3.8, 4.2)         | 32           |
|             |      |                    | 17%    | 59         | 255 (139, 535)                   | 3.9 (3.7, 4.1)         | 37           |
|             |      |                    | 24%    | 58         | 212 (123, 425)                   | 3.9 (3.7, 4.1)         | 40           |
| <i>dsrB</i> | F1   | 79                 | 5%     | 29         | 36 (31, 57)                      | 3.0 (2.8, 3.2)         | 85           |
|             |      |                    | 10%    | 19         | 26 (20, 53)                      | 2.5 (2.3, 2.7)         | 90           |
|             |      |                    | 15%    | 14         | 17 (14, 36)                      | 2.1 (1.9, 2.3)         | 94           |
|             |      |                    | 20%    | 11         | 14 (11, 34)                      | 1.9 (1.7, 2.1)         | 95           |
|             | U3   | 80                 | 5%     | 38         | 88 (56, 180)                     | 3.2 (3.0, 3.5)         | 69           |
|             |      |                    | 10%    | 27         | 50 (33, 109)                     | 2.7 (2.5, 3.0)         | 83           |
|             |      |                    | 15%    | 22         | 40 (27, 98)                      | 2.5 (2.3, 2.8)         | 87           |
|             |      |                    | 20%    | 20         | 43 (25, 116)                     | 2.2 (1.9, 2.5)         | 88           |
|             | W3   | 78                 | 5%     | 35         | 70 (47, 140)                     | 3.2 (3.0, 3.4)         | 73           |
|             |      |                    | 10%    | 19         | 58 (29, 169)                     | 2.1 (1.9, 2.4)         | 83           |
|             |      |                    | 15%    | 17         | 83 (39, 213)                     | 1.9 (1.7, 2.2)         | 86           |
|             |      |                    | 20%    | 16         | 71 (33, 187)                     | 1.8 (1.6, 2.1)         | 86           |

<sup>a</sup>95% confidence interval.

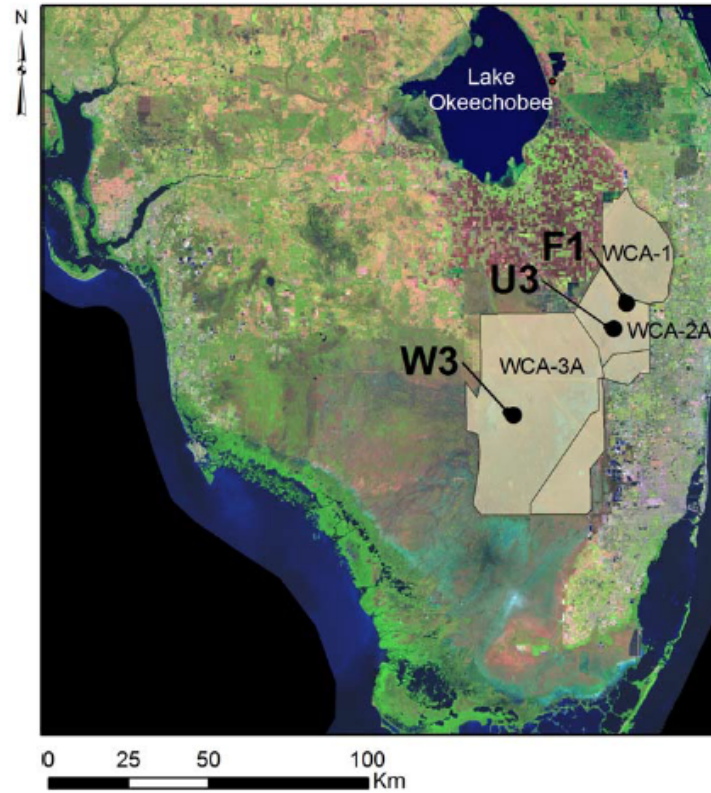

Fig. S1. Location of sampling sites F1 and U3 in WCA-2A and W3 in WCA-3A of the Everglades.

# HgcA

Cap helix

# HgcB

[4Fe-4S]

[4Fe-4S]

Proteobacteria  
 Chloroflexi  
 Firmicutes  
 Euryarchaeota

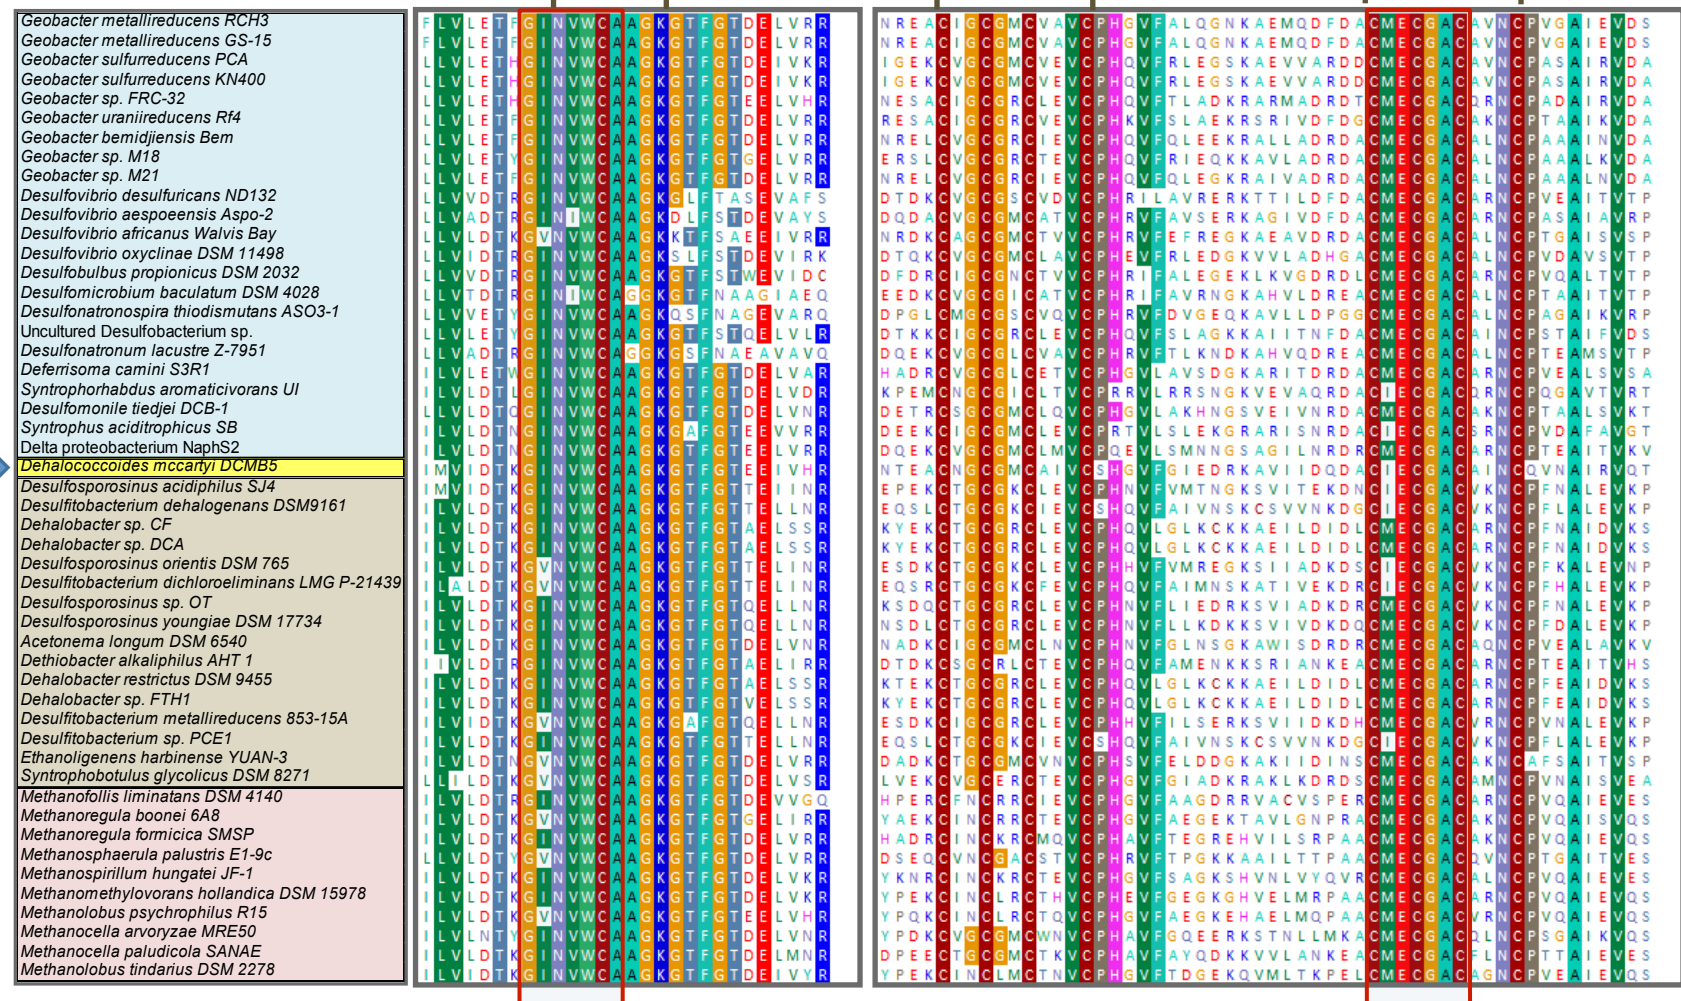

Forward primer binding site

Reverse primer binding site

Fig. S2. Binding sites for primers hgcA\_F (forward) and hgcB-R (reverse) targeting a Cap-helix consensus sequence motif and upper neighbor sequences [G(V/I)N(V/I)WCA(A/G)GK]: underlined sequences are exact binding seqs of *hgcA*, and 4Fe-4S] motifs region (CX<sub>2</sub>CX<sub>2</sub>CX<sub>3</sub>C) of *hgcB*, respectively. The blue arrow denotes the single Chloroflexi sequence.

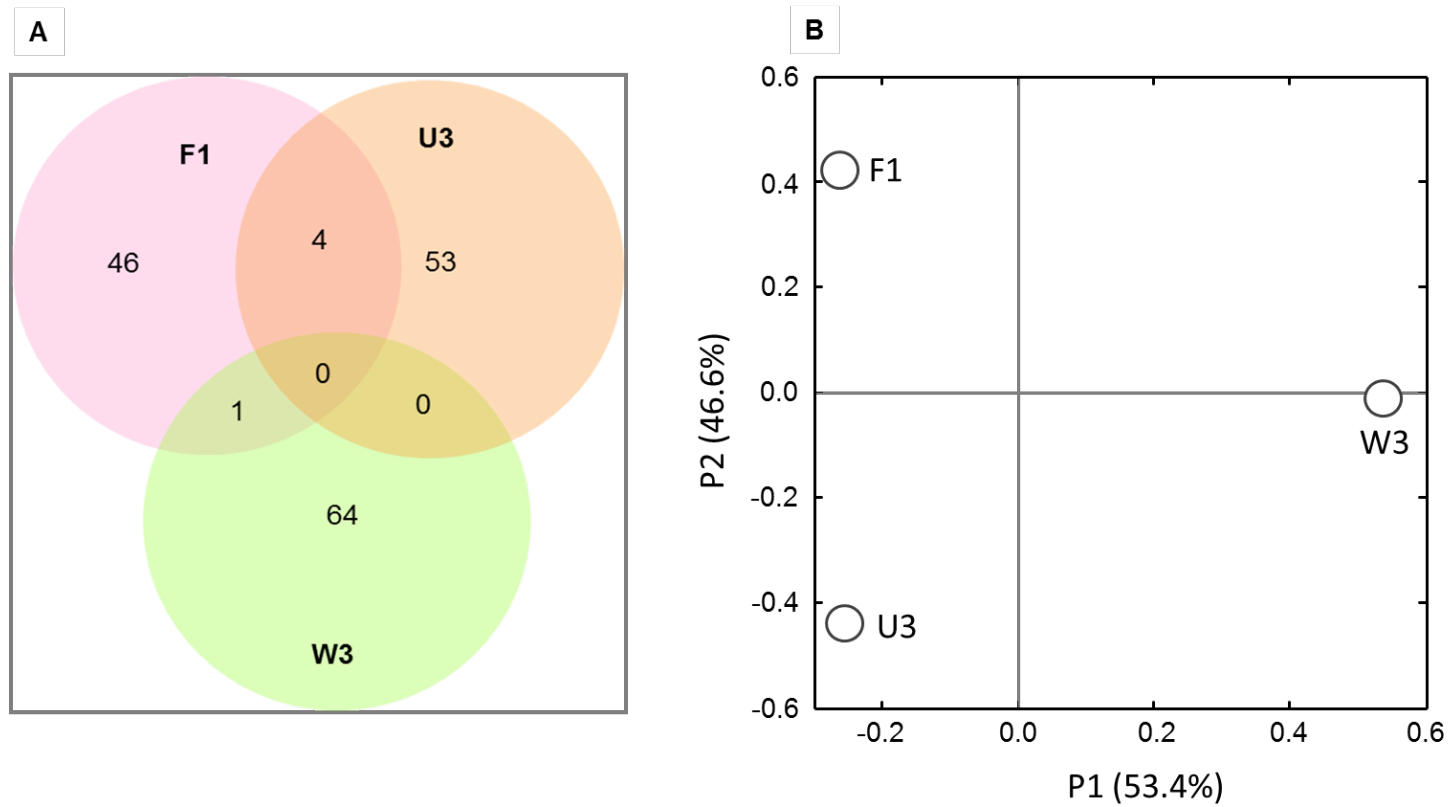

Fig. S3. Venn diagram representing the number of OTUs of *hgcA* shared between sampling sites (A), and PCoA plot showing the distribution *hgcA* community occurred from each study site (B).



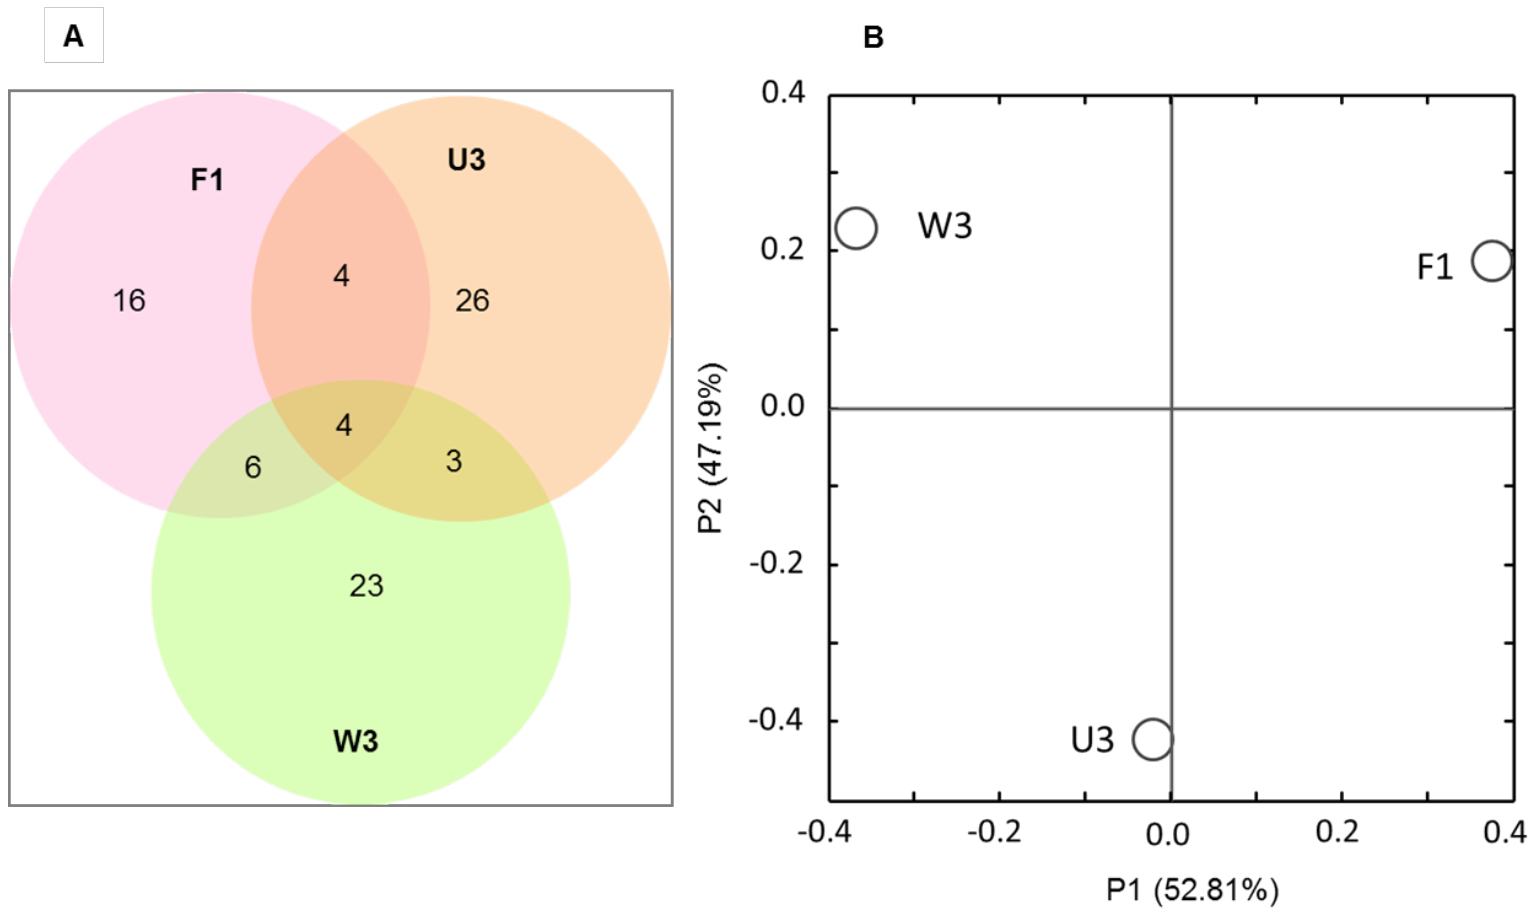

Fig. S4. Venn diagram representing the number of OTUs of *dsrB* shared between sampling sites (A), and PCoA plot showing the distribution *dsrB* community occurred from each study site (B).

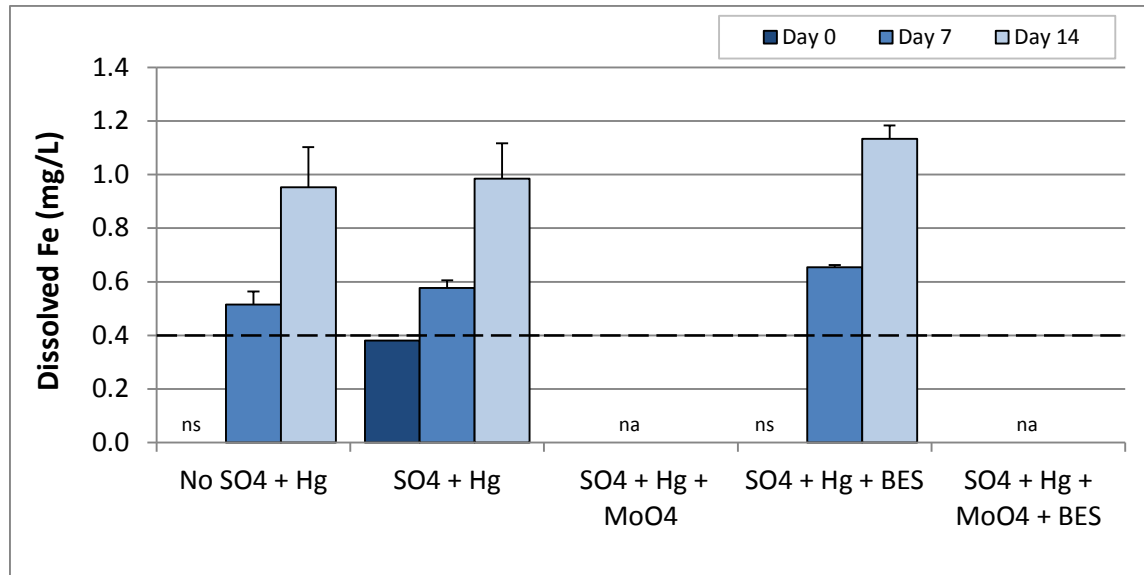

Fig. S5. Concentration of dissolved Fe concentration in the laboratory incubation with W3 soils under treatment of Mo (SuRP inhibitor) and BES (methanogen inhibitor).
